# Supplementary material for: Outcomes of relapsed clinical stage I versus de novo metastatic testicular cancer patients: an analysis of the IGCCCG Update database
Source: PubMed Central journal article supplement (PMC10667594; doi:10.1038/s41416-023-02443-3), 2023-09-30

# Supplement Figure A

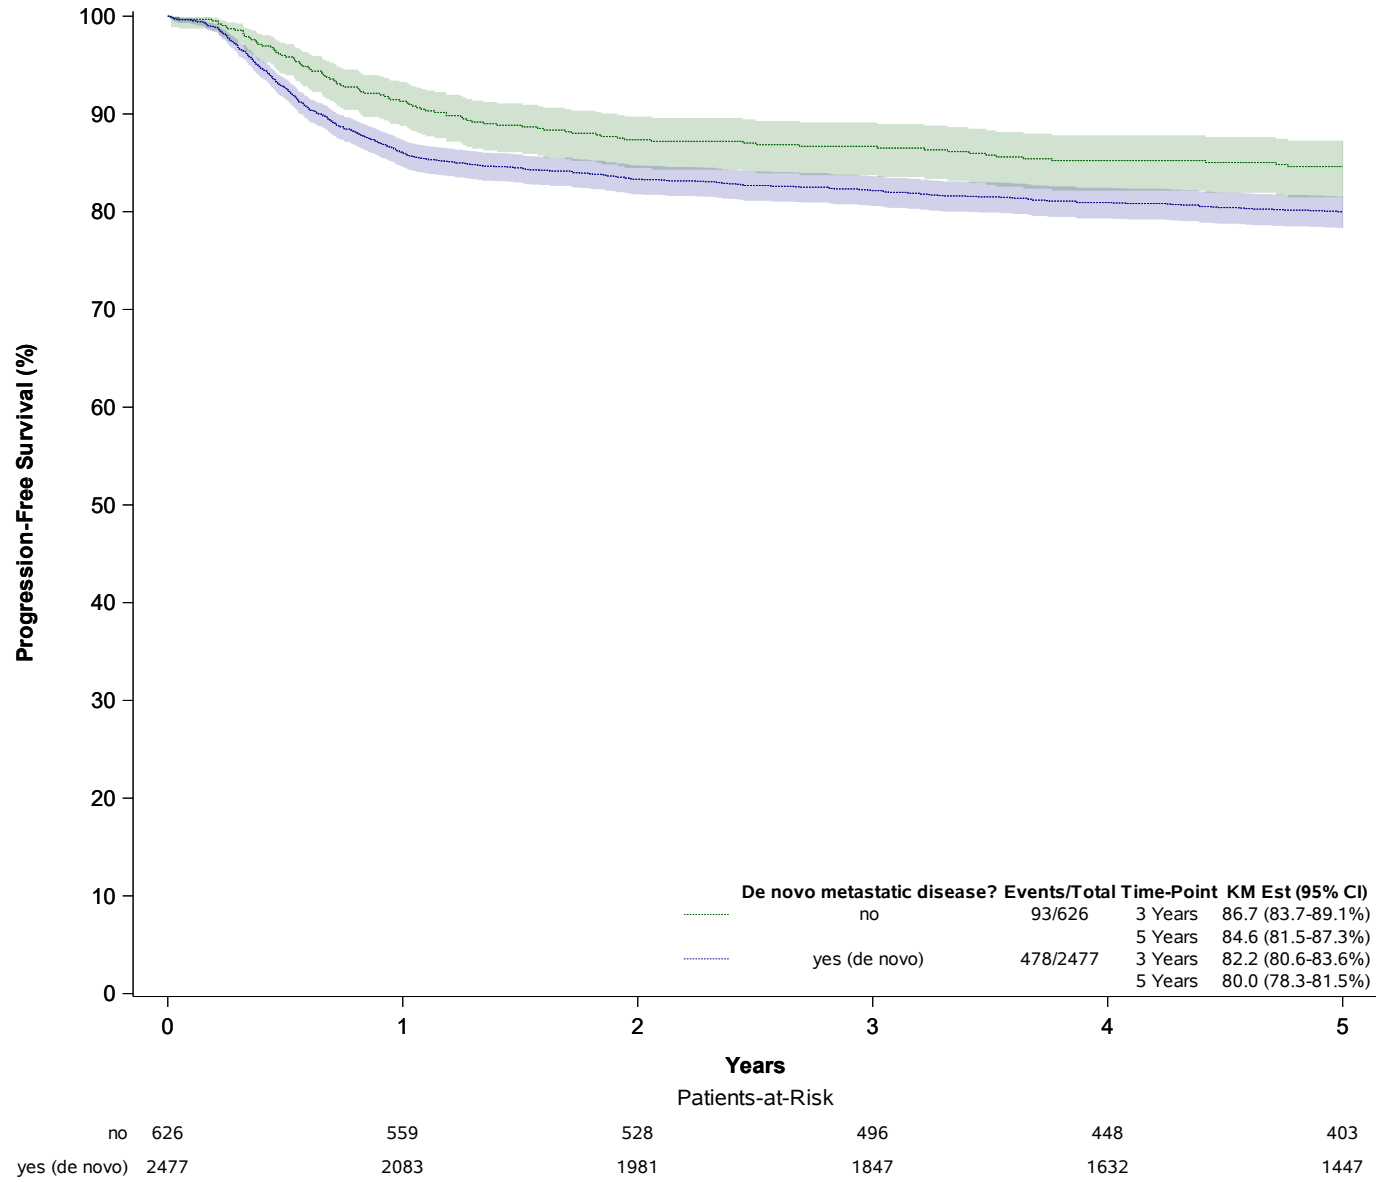

# Supplement Figure B

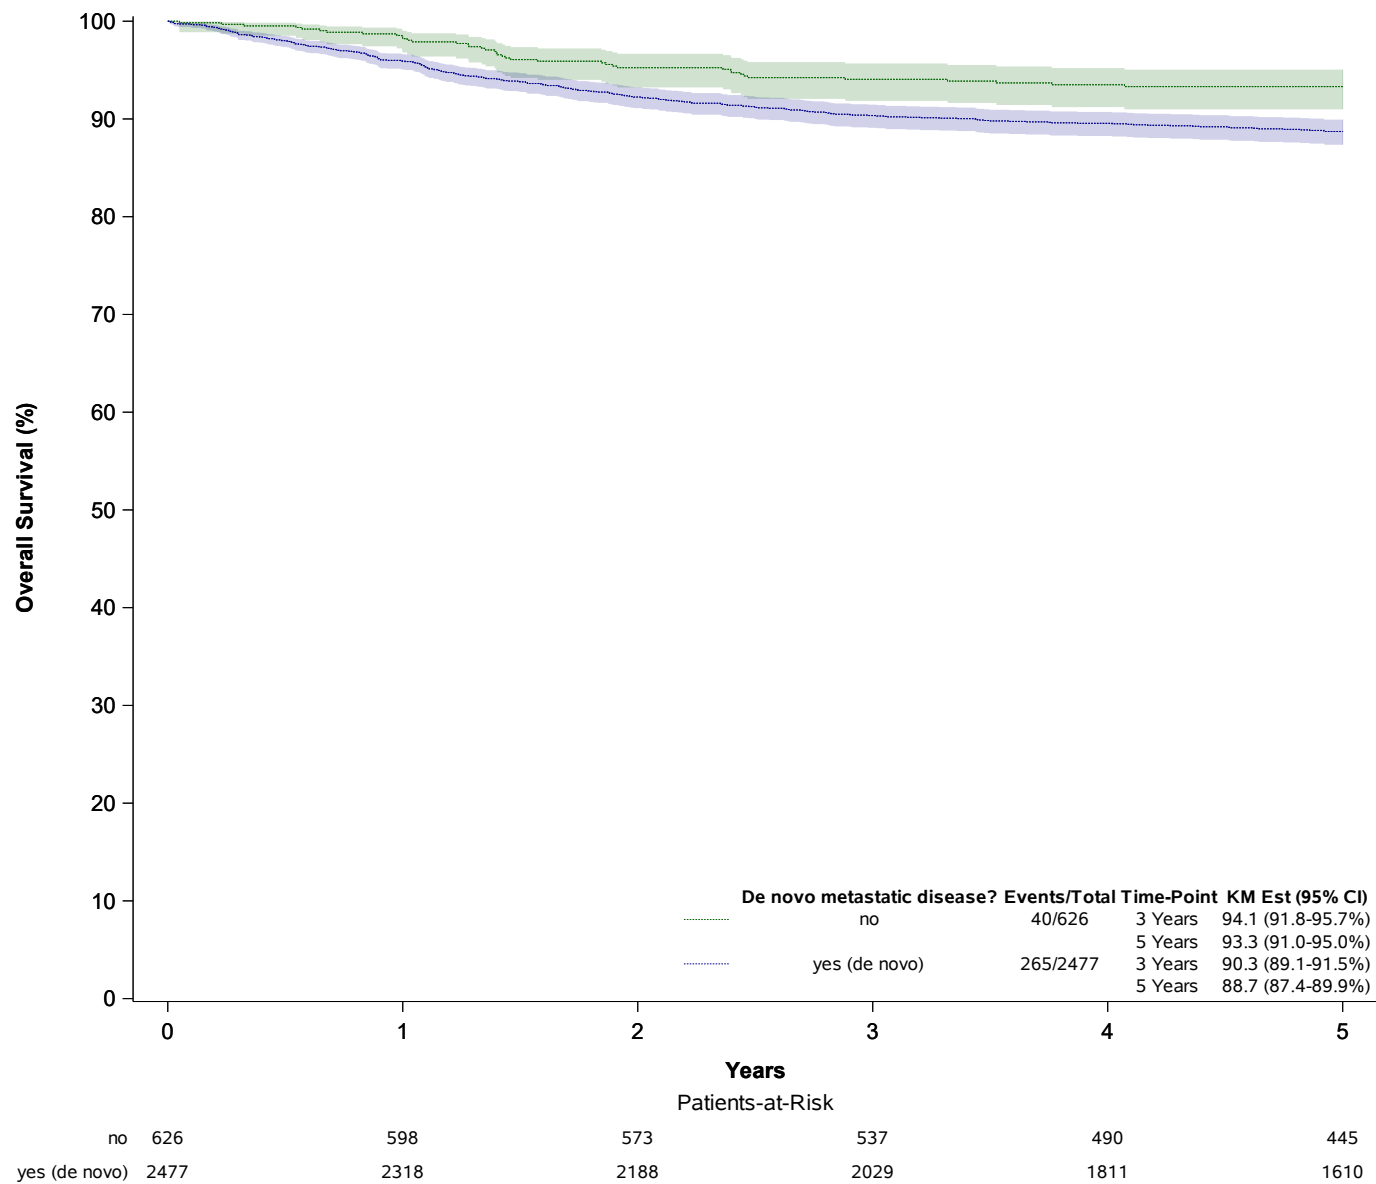

Supplement: 41416_2023_2443_MOESM2_ESM.pdf [file 41416_2023_2443_MOESM2_ESM.pdf]
